**Title:** Sexual and reproductive health service needs associated with underage initiation of selling sex among adult female sex workers in Guinea-Bissau

**Authors:** Ashley Grosso,<sup>1,2</sup> Lindsay Berg,<sup>2</sup> Katherine Rucinski,<sup>3</sup> Amrita Rao,<sup>3</sup> Mamadú Aliu Djaló,<sup>4</sup> Daouda Diouf,<sup>5</sup> Stefan Baral<sup>3</sup>

**Corresponding author:** Ashley Grosso; 112 Paterson Street, New Brunswick, NJ 08840; [agrosso@ifh.rutgers.edu](mailto:agrosso@ifh.rutgers.edu)

**Type of article:** Clinical article

**Key words** female sex workers, Guinea-Bissau, minors, adolescents, reproductive health, sexual health

**Synopsis** Adult female sex workers in Guinea-Bissau who started selling sex while underage had lower uptake of health services including HIV testing and antenatal care.

**Word count (main text)** 2483

---

<sup>1</sup> Rutgers University Institute for Health, Health Care Policy and Aging Research, New Brunswick, NJ, United States

<sup>2</sup> Rutgers School of Public Health, Piscataway, NJ, United States

<sup>3</sup> Key Populations Program, Center for Public Health and Human Rights, Department of Epidemiology, Johns Hopkins Bloomberg School of Public Health

<sup>4</sup> Enda Santé, Guiné-Bissau, Bissau, Guinea-Bissau

<sup>5</sup> Enda Santé, Senegal, Dakar, Senegal

## **Abstract**

*Objective:* To assess the prevalence and predictors of underage initiation of selling sex among female sex workers (FSW) in Guinea-Bissau.

*Methods:* 505 adult FSW recruited using respondent-driven sampling were surveyed in 2017. Multivariable logistic regression was used to identify demographic, behavioral, and psychosocial characteristics associated with initiation of selling sex while underage (<18 years).

*Results:* 26.3% (133/505) of FSW started selling sex before age 18. Underage initiation of selling sex was associated with experiencing forced sex before age 18 (adjusted odds ratio [aOR]:6.74;95% confidence interval [CI]:2.05-22.13), and never being tested for HIV (aOR:0.43;95%CI:0.02-0.91). Despite having lower odds of wanting to have children or more children (aOR:0.31;95%CI:0.17-0.56), FSW who started selling sex while underage had lower odds of using highly effective contraception such as implants (aOR:0.43;95%CI:0.24-0.77). Among those who were ever pregnant, a lower percentage of FSW who started selling sex while underage accessed antenatal care (56.6% v. 74.7%,  $p=0.008$ ).

*Conclusion:* These data suggest that early initiation of selling sex among adult FSW in Guinea-Bissau is common. Social services for youth and integrated HIV and reproductive health services are critical to address the persisting sexual and reproductive health needs of FSW who started selling sex while underage.

## Introduction

Globally, selling sex under the age of 18 is prevalent and confers immediate and long-term vulnerabilities to violence and adverse sexual and reproductive health outcomes.[1] Much of the research on underage entry into selling sex has been conducted in Asia[2] and the Americas.[3-5] A growing body of studies in Africa have included underage participants who sell sex [6-8] or reported the prevalence and predictors of underage entry into selling sex among adult female sex workers (FSW).[9-15]

Compared to FSW who started selling sex as adults, those who started while underage report greater vulnerabilities and less access to sexual and reproductive health services. Across multiple countries in Africa, forced sex has been more commonly reported among FSW who started selling sex while underage.[9, 10, 12] FSW who reported selling sex while underage are more likely to have given birth before age 18 than FSW who entered sex work as adults.[12] Underage entry into selling sex is also associated with reporting barriers to condom use and lower uptake of HIV testing.[9, 10, 15]

In a study with women and girls aged 14 and older selling sex in Uganda, younger age was associated with lower odds of dual use of condoms and non-barrier contraception.[6] In Mozambique, those aged 15-17 years old were more likely than adult FSW to have sexually transmitted infection (STI) symptoms but less likely to have been tested for HIV or used a condom with their last client.[8]

Although studies have been conducted with underage girls who sell sex in Angola[7] and Mozambique,[8] there is a dearth of research on the long-term health

consequences of underage entry into selling sex among FSW in countries in Africa previously colonized by Portugal.

Guinea-Bissau is a West African country that declared independence from Portugal in 1973 and is bordered by Senegal and Guinea. In Guinea-Bissau, sex work is not legally specified (i.e., neither criminalized nor legalized).[16] The population size estimate of sex workers in four regions of Guinea-Bissau (Bissau, Bissorã, Bafatá, and Gabú) is 7,900.[17] In one study, over one quarter of FSW in Guinea-Bissau were living with HIV, compared to about 3.8% among all reproductive-age women.[18] In the same study, FSW under the age of 30 had higher odds of undiagnosed HIV infection than those aged 30 or older. The objective of this research is to examine the prevalence of and factors associated with underage initiation of selling sex among adult FSW in Guinea-Bissau.

## **Materials and methods**

FSW were recruited for this cross-sectional observational study through respondent-driven sampling (RDS) in Bafatá, Bissau, Bissorã, and Gabu in Guinea-Bissau from September through November 2017.[19] To be eligible, participants needed to be at least 18 years old, a resident in one of the study cities, capable of providing informed consent, and self-report that their sex assigned at birth was female and they earned over half of their income in the past 12 months from selling sex. All eligible participants completed an interviewer-administered questionnaire. Data collection was approved by the National Research Ethics Committee of Guinea-Bissau. The Johns

Hopkins Bloomberg School of Public Health Institutional Review Board approved secondary data analysis of deidentified data.

FSW who reported selling sex before the age of 18 were categorized as having initiated selling sex while underage and compared to those who started at 18 years or older using  $\chi^2$  statistics for categorical variables and t-tests for continuous variables. Bivariate logistic regression analyses were then conducted using underage entry into selling sex as the dependent variable. Variables significantly related to initiation of selling sex while underage in bivariate models ( $p < 0.05$ ) were considered for inclusion in a multivariable logistic regression model. The variables in the final model were chosen based on the lowest Akaike information criterion through a forward selection method using the `swaic` command in StataMP 16 (College Station, TX). RDS-adjustment was not conducted because data were pooled from all four cities, and the participants do not represent a single network of FSW.

Continuous independent variables included age at the time of study and number of biological children. Dichotomous independent variables included literacy in Portuguese and/or Creole; ever experiencing forced sex while underage; ever being pregnant; receiving antenatal care during their most recent pregnancy; wanting children or more children in the future at the time of the study; use of emergency contraception ever; current contraceptive method(s) (sterilization, pill, implant, intrauterine device [IUD], injectable, male condoms, female condoms); experiencing STI symptoms in the past 12 months; having ever been tested for HIV; and knowledge that anal sex carries the highest risk for HIV acquisition. Categorical independent variables included city, marital status (single and never married, stable partner that is not a spouse, married,

divorced/separated, or widowed), and employment status other than sex work (unemployed, employed, or student).

## Results

As shown in Table 1, the mean age of FSW in Guinea-Bissau was 25.2 (standard deviation [SD]=6.2, range 18-50). Nearly all participants were born in Guinea-Bissau (94.3%, 476/505). Most resided in the city of Bissau (60.6%, 306/505). Over one quarter (27.5%, 138/502) could not read or write. Over three quarters were single and never married (79.2%, 400/505). Over half (53.9%, 272/504) were unemployed other than selling sex. 4.0% (20/504) were forced to have sex when under the age of 18. Over half (58.5%, 289/494) had ever been pregnant. Of those, 71.5% (213/298) received antenatal care during their last pregnancy. The mean number of biological children was 1.2 (SD=1.4). About two thirds (66.1%, 334/505) said they plan or hope to have children or more children in the future. 81.6% (411/504) were using some form of contraception at the time of the study. STI symptoms in the past year were reported by 29.7% (144/485). Less than one third (30.1%, 151/502) had ever tested for HIV. Only 13.1% (66/504) knew that anal sex put them at higher risk of HIV infection than vaginal or oral sex. Over one quarter of FSW (26.3%, 133/505) started selling sex before the age of 18.

The mean current age of FSW who started selling sex while underage was younger than that of FSW who did not (22.0 v. 26.4 years). A higher percentage of women who started selling sex while underage were born in Guinea-Bissau (97.7% v. 93.0%) and literate (79.7% v. 69.9%) than women who did not. Compared to

participants who did not report selling sex while underage, a higher proportion of participants who did were single and never married or in a relationship with a stable partner, while a lower proportion were married, divorced, separated, or widowed. A higher percentage of those who started selling sex while underage were students or had a job outside of sex work than those who did not. A higher proportion of women who started selling sex while underage were forced to have sex as a minor than women who did not (9.0% v. 2.2%). The mean number of biological children was lower for participants who started selling sex while underage than for participants who did not (1.3 v. 0.7 children). A lower percentage of those who started selling sex as minors had ever been pregnant (38.8% v. 65.5%), received antenatal care (56.6% v. 74.7%), and wanted more children (51.1% v. 71.5%). Although more FSW who started selling sex while underage used any form of contraception than FSW who did not (87.9% v. 79.3%), fewer used most of the contraceptive methods investigated in the study: emergency contraception (6.9% v. 16.6%), sterilization (4.6% v. 15.9%), implant (29.6% v. 42.5%), IUD (7.6% v. 8.1%), injectable (0.8% v. 4.0%), and female condoms (3.0% v. 6.5%). In contrast, a higher proportion of women who started selling sex while underage used oral contraceptives (10.6% v. 5.1%) or male condoms (51.5% v. 36.3%). Participants who started selling sex while underage had a higher prevalence of STI symptoms in the past 12 months (38.0% v. 26.7%). Fewer of those who started selling sex while underage had ever been tested for HIV (16.5% v. 35.0%). Knowledge that anal sex carries higher risk for HIV acquisition was less prevalent among FSW who started selling sex while underage compared to those who did not (3.0% v. 16.7%).

As shown in Table 2, underage entry into selling sex was associated with younger age at the time of the study (odds ratio [OR]:0.84;95% confidence interval [CI]:0.80-0.89). Compared to women who started selling sex as adults, women who started selling sex while underage had lower odds of living in Bafatá (OR:0.54;95%CI:0.31-0.95) vs. Bissau. Underage initiation of selling sex was associated with being literate in Portuguese and/or Creole (OR:1.69;95%CI:1.05-2.72). FSW who started selling sex while underage had lower odds of being married (OR:0.21;95%CI:0.64-0.71) or widowed (OR:0.12;95%CI:0.02-0.91) vs. single. Underage entry into selling sex was associated with having an additional job outside of selling sex (OR:1.86;95%CI:1.15-3.00) or being a student (OR:2.17;95%CI:1.33-3.56) vs. having no other job. Those who started selling sex while underage had over four times the odds of having been forced to have sex as a minor (OR:4.46;95%CI:1.78-11.18). Participants who started selling sex while underage had lower odds of ever being pregnant (OR:0.33;95%CI:0.22-0.51), receiving antenatal care while pregnant (OR:0.44;95%CI:0.24-0.82), or wanting any children or more children (OR:0.42;95%CI:0.28-0.63). Underage initiation of selling sex was associated with having fewer biological children (OR:0.67;95%CI:0.55-0.81). Women who started selling sex while underage had lower odds of ever using emergency contraception (OR:0.37;95%CI:0.18-0.77), being sterilized (OR:0.26;95%CI:0.11-0.61), or currently using a contraceptive implant (OR:0.57;95%CI:0.37-0.87) but higher odds of using any contraception (OR:1.89;95%CI:1.06-3.38), oral contraception (OR:2.20;95%CI:1.07-4.53) or male condoms for contraception (OR:1.87;95%CI:1.25-2.79). Underage entry into selling sex was associated having STI symptoms (OR:1.68;95%CI:1.10-2.58),



never being tested for HIV (OR:0.37;95%CI:0.22-0.61), and not knowing that anal sex puts them at most risk for HIV infection (OR:0.15;95%CI:0.06-0.43). Country of birth and using an IUD, injectable contraception, or female condoms were not significantly related to underage initiation into selling sex.

In the multivariable analysis, as shown in Table 3, the relationship between underage entry into selling sex and younger age remained statistically significant (adjusted odds ratio [aOR]:0.82;95%CI:0.76-0.89). FSW who started selling sex while underage had higher odds of living in Gabu vs. Bissau (OR:6.17;95%CI:2.35-16.15) and having a stable partner who is not a spouse (OR:8.70;95%CI:2.63-28.79). Participants who started selling sex while underage had over six times the odds of ever experiencing forced sex as a minor (aOR:6.74;95%CI:2.05-22.13). Despite having lower odds of ever being pregnant (aOR:0.40;95%CI:0.22-0.73), those who started selling sex while underage had lower odds of saying they plan to or hope to have children or more children in the future (aOR:0.31;95%CI:0.17-0.56) and lower odds of reporting using a contraceptive implant (aOR:0.43;95%CI:0.24-0.77). Initiation of selling sex while underage was inversely associated with ever being tested for HIV (aOR:0.43;95%CI:0.20-0.91) and knowledge that anal sex is most risky for HIV acquisition (OR:0.12;95%CI:0.02-0.59). Experiencing STI symptoms in the past year was not significantly related to underage entry into selling sex in the multivariable model.

## Discussion

In this study more than one in four FSW started selling sex while underage. FSW who started selling sex while underage had higher odds of experiencing forced sex before the age of 18 and lower odds of ever being pregnant, wanting to have children, using contraceptive implants, ever testing for HIV, and knowing that anal sex puts them most at risk for HIV than FSW who started selling sex as adults.

Similar to other studies with FSW in Africa[10, 12] underage entry into selling sex in Guinea-Bissau was also associated with experiencing forced sex while underage. This would indicate a potential need for health services such as emergency contraception and HIV testing, but in this sample among those who started selling sex while underage, less than 7% and 17% had ever used these services, respectively. [20]

Prior research in other African countries has shown that underage entry into selling sex was associated with having an unwanted pregnancy[9, 13] and giving birth while underage.[12] However, in Guinea-Bissau women who started selling sex while underage had lower odds of reporting ever being pregnant and had fewer biological children than women who started selling sex as adults. Despite reported preferences to not have children or more children, FSW in this study who started selling sex while underage had lower odds of highly effective contraceptive methods such as implants.[21] Access to a range of highly effective contraceptive methods is particularly important for women who started selling sex while underage who do not want to have children because pregnancy and childbirth can have serious negative physical and psychological health consequences for women with a history of childhood sexual abuse.[22] Receiving antenatal care is associated with better maternal and infant health

outcomes,[23] but over forty percent of FSW who started selling sex while underage in Guinea-Bissau who had ever been pregnant did not receive antenatal care.

Destigmatizing and making antenatal care services friendly toward FSW and adolescents may improve uptake among these populations.[24]

Over half of FSW in this study who started selling sex while underage reported current use of male condoms for contraception, which can also help protect them from HIV and other STIs. However, over one third had experienced STI symptoms in the past 12 months, suggesting the need for further prevention and treatment services. In this study, only 3% of FSW who started selling sex while underage knew that anal sex carries the highest risk for HIV acquisition rather than vaginal or oral sex. This is notable because other research in Burkina Faso has shown that FSW who started selling sex while underage were more likely to have had anal sex in the past year.[9] This gap in knowledge about HIV may be due to limited access to information. In other research, FSW underage entry into selling sex was associated with not attending talks or meetings about HIV.[9] Updating programs used for comprehensive sex education for adolescents as well as FSW to include the specifics of transmission risks could help address this knowledge gap.

This study has some limitations. This is a secondary data analysis, and the sample size may not have been large enough to detect differences in some indicators between those who started selling sex while underage and those who did not. The data are cross-sectional, therefore causal inferences could not be made. Adjustment for the RDS design was not possible due to pooling data from multiple cities. The sample only included adult FSW, so inferences cannot be made about girls who sell sex while

underage and stop selling sex before adulthood. Additionally, the data are self-reported and may be subject to inaccurate recall and social desirability bias.

Despite these limitations, this study contributes to the limited research on sex work in Guinea-Bissau.[18] Given the high prevalence of underage entry into selling sex and the suboptimal uptake of sexual and reproductive health services among this group, these findings underscore the need to prevent early initiation of selling sex and focus programmatic attention on overcoming barriers to care among those who previously or currently sell sex while underage to prevent HIV, STIs, unintended pregnancies, and negative maternal and child health outcomes.

## References

- [1] Decker MR: Sex trafficking, sex work, and violence: Evidence for a new era. *International Journal of Gynecology and Obstetrics* 2013;120(2): 113-114.
- [2] George A, Sabarwal S: Sex trafficking, physical and sexual violence, and HIV risk among young female sex workers in Andhra Pradesh, India. *International Journal of Gynecology and Obstetrics* 2013;120(2): 119-123.
- [3] Decker MR, Miller E, McCauley HL, Tancredi DJ, Levenson RR, Waldman J, et al.: Sex trade among young women attending family-planning clinics in Northern California. *International Journal of Gynecology and Obstetrics* 2012;117(2): 173-177.
- [4] Oza KK, Silverman JG, Bojorquez I, Strathdee SA, Goldenberg SM: Examining negative effects of early life experiences on reproductive and sexual health among female sex workers in Tijuana, Mexico. *International Journal of Gynecology and Obstetrics* 2015;128(2): 169-173.
- [5] Serafini P: Juvenile prostitution in Brazil: An international call to action on female sex trafficking. *International Journal of Gynecology and Obstetrics* 2012;118(2): 89-89.
- [6] Erickson M, Goldenberg SM, Ajok M, Muldoon KA, Muzaaya G, Shannon K: Structural determinants of dual contraceptive use among female sex workers in Gulu, northern Uganda. *International Journal of Gynecology and Obstetrics* 2015;131(1): 91-95.
- [7] Herce ME, Miller WM, Bula A, Edwards JK, Sapalalo P, Lancaster KE, et al.: Achieving the first 90 for key populations in sub-Saharan Africa through venue-based outreach: Challenges and opportunities for HIV prevention based on PLACE study findings from Malawi and Angola. *Journal of the International AIDS Society* 2018;21: e25132.
- [8] Inguane C, Horth RZ, Miranda AE, Young PW, Sathane I, Cummings BE, et al.: Socio-demographic, behavioral and health characteristics of underage female sex workers in Mozambique: The need to protect a generation from HIV risk. *AIDS and Behavior* 2015;19(12): 2184-2193.
- [9] Grosso AL, Ketende S, Dam K, Papworth E, Ouedraogo HG, Ky-Zerbo O, et al.: Structural determinants of health among women who started selling sex as minors in Burkina Faso. *Journal of Acquired Immune Deficiency Syndromes* 2015;68: S162-S170.
- [10] Grosso A, Busch S, Mothopeng T, Sweitzer S, Nkonyana J, Mpooa N, et al.: HIV risks and needs related to the Sustainable Development Goals among female sex workers who were commercially sexually exploited as children in Lesotho. *Journal of the International AIDS Society* 2018;21: e25042.
- [11] Grosso A, Fielding-Miller R, Matse S, Mnisi Z, Sithole B, Baral S: Younger initiation of selling sex and depressive symptoms among female sex workers in eSwatini. *Journal of the International AIDS Society* 2020;23: e25547.
- [12] Grosso AL, Lyons, C., Diouf, D., Liestman, B., Ezouatchi, R., Thiam-Niangoin, M., Abo, K., Drame, F., Bamba, A., Tety, J., Obodou, E., Ba, I., and Baral, S. Ethical and human rights considerations for inclusion of minors who sell sex in epidemiological, prevention, and other research: Evidence from female sex workers in Abidjan, Côte d'Ivoire. International AIDS Society Conference. Paris, France. 2017.

- [13] Grosso AL, Ketende S, Dam K, Papworth E, Ouedraogo G, Ky-Zerbo O, et al. Prevention and treatment needs of women who started selling sex as minors. International AIDS Conference. Melbourne, Australia. 2014.
- [14] Grosso A, Pitche V, Kochelani D, Kouanda S, Ky-Zerbo O, Kouame A, et al. Experiences of loss of a parent before age 18 among female sex workers across seven Western and Southern African countries. the International AIDS Conference. Amsterdam, Netherlands. 2018.
- [15] Parcesepe AM, L'Engle KL, Martin SL, Green S, Suchindran C, Mwarogo P: Early sex work initiation and condom use among alcohol-using female sex workers in Mombasa, Kenya: a cross-sectional analysis. *Sexually transmitted infections* 2016;92(8): 593-598.
- [16] Bureau of Democracy Human Rights and Labor. 2008 Country Reports on Human Rights Practices: Guinea Bissau. US State Department. 2009.
- [17] UNAIDS. Country factsheets: Guinea-Bissau. 2020.
- [18] Lindman J, Djalo MA, Biai A, Månsson F, Esbjörnsson J, Jansson M, et al.: The HIV care continuum and HIV-1 drug resistance among female sex workers: A key population in Guinea-Bissau. *AIDS Research and Therapy* 2020;17(1): 1-11.
- [19] Lyons CE, Schwartz SR, Murray SM, Shannon K, Diouf D, Mothopeng T, et al.: The role of sex work laws and stigmas in increasing HIV risks among sex workers. *Nature Communications* 2020;11(1): 773.
- [20] FIGO Committee For the Ethical Aspects Of Human Reproduction Women's Health: Ethical issues after sexual assault. *International Journal of Gynaecology and Obstetrics* 2014;128(2): 187-188.
- [21] Thaxton L, Lavelanet A: Systematic review of efficacy with extending contraceptive implant duration. *International Journal of Gynecology & Obstetrics* 2019;144(1): 2-8.
- [22] Brunton R, Dryer R: Child sexual abuse and pregnancy: a systematic review of the literature. *Child Abuse and Neglect* 2021;111: 104802.
- [23] Alam N, Hajizadeh M, Dumont A, Fournier P: Inequalities in maternal health care utilization in sub-Saharan African countries: a multiyear and multi-country analysis. *PLOS ONE* 2015;10(4): e0120922.
- [24] Bukenya J, Barrett G, Kaharuza F, Guwatudde D, Wanyenze RK: Factors associated with utilization of maternal health services by female sex workers in Uganda: a health facility-based survey. *PREPRINT available at Research Square* 21 August 2019: <https://doi.org/10.21203/rs.21202.12740/v21201>.

| <b>Table 1 Characteristics of female sex worker study participants (n=505) in Guinea-Bissau by early or later initiation of selling sex, 2017</b> |                                |                                   |                 |                            |
|---------------------------------------------------------------------------------------------------------------------------------------------------|--------------------------------|-----------------------------------|-----------------|----------------------------|
| <b>Variable</b>                                                                                                                                   | <b>Started Selling Sex 18+</b> | <b>Started Selling Sex &lt;18</b> | <b>Total</b>    | <b>P-Value<sup>1</sup></b> |
| <b>Current age [mean (SD)]</b>                                                                                                                    | 26.4 (6.5)                     | 22.0 (4.1)                        | 25.2 (6.2)      | <0.001                     |
| <b>Born in Guinea-Bissau</b>                                                                                                                      | 93.0% (346/372)                | 97.7% (130/133)                   | 94.3% (476/505) | 0.044                      |
| <b>City</b>                                                                                                                                       |                                |                                   |                 | 0.047                      |
| Bissau                                                                                                                                            | 56.7% (222/372)                | 63.2% (84/133)                    | 60.6% (306/505) |                            |
| Bissora                                                                                                                                           | 8.9% (33/372)                  | 10.5% (14/133)                    | 9.3% (47/505)   |                            |
| Bafata                                                                                                                                            | 23.7% (88/372)                 | 13.5% (18/133)                    | 20.9% (106/505) |                            |
| Gabu                                                                                                                                              | 7.8% (29/372)                  | 12.8% (17/133)                    | 9.1% (46/505)   |                            |
| <b>Literate in Portuguese and/or Creole</b>                                                                                                       | 69.9% (258/369)                | 79.7% (106/133)                   | 72.5% (364/502) | 0.030                      |
| <b>Current relationship status</b>                                                                                                                |                                |                                   |                 | 0.001                      |
| Single and never married                                                                                                                          | 76.1% (283/372)                | 87.9% (117/133)                   | 79.2% (400/505) |                            |
| Stable partner that is not spouse                                                                                                                 | 3.5% (13/372)                  | 6.8% (9/133)                      | 4.4% (22/505)   |                            |
| Married                                                                                                                                           | 9.1% (34/372)                  | 2.3% (3/133)                      | 7.3% (37/505)   |                            |
| Divorced/ Separated                                                                                                                               | 5.9% (22/372)                  | 2.3% (3/133)                      | 4.9% (25/505)   |                            |
| Widowed                                                                                                                                           | 5.4% (20/372)                  | 0.8% (1/133)                      | 4.2% (21/505)   |                            |
| <b>Other work</b>                                                                                                                                 |                                |                                   |                 | 0.003                      |
| No additional work                                                                                                                                | 58.5% (217/371)                | 41.4% (55/133)                    | 53.9% (272/504) |                            |
| Outside work                                                                                                                                      | 22.9% (85/371)                 | 30.1% (40/133)                    | 24.8% (125/504) |                            |
| Student                                                                                                                                           | 18.6% (69/371)                 | 28.6% (38/133)                    | 21.2% (107/504) |                            |
| <b>Was forced to have sex &lt;18 years old</b>                                                                                                    | 2.2% (8/368)                   | 9.0% (12/133)                     | 4.0% (20/501)   | 0.001                      |
| <b>Ever pregnant</b>                                                                                                                              | 65.5% (239/365)                | 38.8% (50/129)                    | 58.5% (289/494) | <0.001                     |
| <b>Received antenatal care*</b>                                                                                                                   | 74.7% (183/245)                | 56.6% (30/53)                     | 71.5% (213/298) | 0.008                      |
| <b>Number of biological children [mean (SD)]</b>                                                                                                  | 1.3 (1.4)                      | 0.7 (1.1)                         | 1.2 (1.4)       | <0.001                     |
| <b>Wants (more) children</b>                                                                                                                      | 71.5% (266/372)                | 51.1% (68/133)                    | 66.1% (334/505) | <0.001                     |
| <b>Ever used emergency contraception</b>                                                                                                          | 16.6% (61/367)                 | 6.9% (9/130)                      | 14.1% (70/497)  | 0.006                      |
| <i>Contraceptive method currently using</i>                                                                                                       |                                |                                   |                 |                            |
| Sterilized                                                                                                                                        | 15.9% (58/366)                 | 4.6% (6/130)                      | 12.9% (64/496)  | 0.001                      |
| Pill                                                                                                                                              | 5.1% (19/372)                  | 10.6% (14/132)                    | 6.6% (33/504)   | 0.028                      |
| Implant                                                                                                                                           | 42.5% (158/372)                | 29.6% (39/132)                    | 39.1% (197/504) | 0.009                      |
| IUD                                                                                                                                               | 8.1% (30/372)                  | 7.6% (10/132)                     | 7.9% (40/504)   | 0.858                      |
| Injectable                                                                                                                                        | 4.0% (15/372)                  | 0.8% (1/132)                      | 3.2% (16/504)   | 0.065                      |
| Male condom                                                                                                                                       | 36.3% (135/372)                | 51.5% (68/132)                    | 40.3% (203/504) | 0.002                      |

<sup>1</sup> T-tests were conducted for continuous variables.  $\chi^2$  tests were conducted for categorical variables.

|                                                                                                                                                                                                                                                                                                                                                                                                                                                  |                 |                 |                 |        |
|--------------------------------------------------------------------------------------------------------------------------------------------------------------------------------------------------------------------------------------------------------------------------------------------------------------------------------------------------------------------------------------------------------------------------------------------------|-----------------|-----------------|-----------------|--------|
| Female condom                                                                                                                                                                                                                                                                                                                                                                                                                                    | 6.5% (24/372)   | 3.0% (4/132)    | 5.6% (28/504)   | 0.140  |
| Any form of birth control                                                                                                                                                                                                                                                                                                                                                                                                                        | 79.3% (295/372) | 87.9% (116/132) | 81.6% (411/504) | 0.029  |
| <b>STI symptoms past 12 months</b>                                                                                                                                                                                                                                                                                                                                                                                                               | 26.7% (95/356)  | 38.0% (49/129)  | 29.7% (144/485) | 0.016  |
| <b>Ever tested for HIV</b>                                                                                                                                                                                                                                                                                                                                                                                                                       | 35.0% (129/369) | 16.5% (22/133)  | 30.1% (151/502) | <0.001 |
| <b>Knowledge that anal sex puts you most at risk for HIV</b>                                                                                                                                                                                                                                                                                                                                                                                     | 16.7% (62/371)  | 3.0% (4/133)    | 13.1% (66/504)  | <0.001 |
| <p>SD=standard deviation, HIV=human immunodeficiency virus, IUD=intrauterine device, STI=sexually transmitted infection<br/>           Missing due to “don’t know” and “refusal” responses: literacy 3, other work 1, forced sex 4, ever pregnant 11, number of children 7, emergency contraception 8, sterilized 9, contraceptive method 1, STI symptoms 20, HIV test 3, HIV knowledge 1<br/>           *Among those who were ever pregnant</p> |                 |                 |                 |        |



**Table 2 Bivariate logistic regression analyses of correlates of underage initiation of selling sex among female sex worker study participants (n=505) in Guinea-Bissau, 2017**

| Variable                                          | Odds Ratio | 95% Confidence Interval | p-value |
|---------------------------------------------------|------------|-------------------------|---------|
| <b>Current age (continuous)</b>                   | 0.84       | 0.80-0.89               | <0.001  |
| <b>Born in Guinea-Bissau</b>                      | 0.31       | 0.91-1.03               | 0.056   |
| <b>City</b>                                       |            |                         |         |
| Bissau (ref)                                      |            |                         |         |
| Bissora                                           | 1.12       | 0.57-2.20               | 0.739   |
| Bafata                                            | 0.54       | 0.31-0.95               | 0.033   |
| Gabu                                              | 1.55       | 0.81-2.97               | 0.186   |
| <b>Literate in Portuguese and/or Creole</b>       | 1.69       | 1.05-2.72               | 0.031   |
| <b>Current relationship status</b>                |            |                         |         |
| Single and never married (ref)                    |            |                         |         |
| Stable partner that is not spouse                 | 1.67       | 0.70-4.02               | 0.249   |
| Married                                           | 0.21       | 0.64-0.71               | 0.012   |
| Divorced/ Separated                               | 0.33       | 0.10-1.12               | 0.076   |
| Widowed                                           | 0.12       | 0.02-0.91               | 0.040   |
| <b>Other work</b>                                 |            |                         |         |
| No additional work (ref)                          |            |                         |         |
| Outside work                                      | 1.86       | 1.15-3.00               | 0.011   |
| Student                                           | 2.17       | 1.33-3.56               | 0.002   |
| <b>Was forced to have sex &lt;18 years old</b>    | 4.46       | 1.78-11.18              | 0.001   |
| <b>Ever pregnant</b>                              | 0.33       | 0.22-0.51               | <0.001  |
| <b>Received antenatal care</b>                    | 0.44       | 0.24-0.82               | 0.010   |
| <b>Number of biological children (continuous)</b> | 0.67       | 0.55-0.81               | <0.001  |
| <b>Wants (more) children</b>                      | 0.42       | 0.28-0.63               | <0.001  |
| <b>Ever used emergency contraception</b>          | 0.37       | 0.18-0.77               | 0.008   |
| <i>Contraceptive method currently using</i>       |            |                         |         |
| Sterilized                                        | 0.26       | 0.11-0.61               | 0.002   |
| Pill                                              | 2.20       | 1.07-4.53               | 0.032   |
| Implant                                           | 0.57       | 0.37-0.87               | 0.009   |
| IUD                                               | 0.93       | 0.44-1.97               | 0.858   |
| Injectable                                        | 0.18       | 0.02-1.39               | 0.100   |
| Male condom                                       | 1.87       | 1.25-2.79               | 0.002   |
| Female condom                                     | 0.45       | 0.15-1.33               | 0.150   |
| Any form of birth control                         | 1.89       | 1.06-3.38               | 0.031   |
| <b>STI symptoms past 12 months</b>                | 1.68       | 1.10-2.58               | 0.017   |

|                                                              |      |           |        |
|--------------------------------------------------------------|------|-----------|--------|
| <b>Ever tested for HIV</b>                                   | 0.37 | 0.22-0.61 | <0.001 |
| <b>Knowledge that anal sex puts you most at risk for HIV</b> | 0.15 | 0.06-0.43 | <0.001 |

HIV=human immunodeficiency virus, IUD=intrauterine device, STI=sexually transmitted infection  
If no category is listed, the reference category is “no” and the category shown in the table is “yes”.

**Table 3 Multivariable logistic regression analysis of correlates of underage initiation of selling sex among female sex worker study participants (n=468) in Guinea-Bissau, 2017**

| <b>Variable</b>                                                                                                                                                                                                                                            | <b>Adjusted Odds Ratio</b> | <b>95% Confidence Interval</b> | <b>p-value</b> |
|------------------------------------------------------------------------------------------------------------------------------------------------------------------------------------------------------------------------------------------------------------|----------------------------|--------------------------------|----------------|
| <b>Current age (continuous)</b>                                                                                                                                                                                                                            | 0.82                       | 0.76-0.89                      | <0.001         |
| <b>City</b>                                                                                                                                                                                                                                                |                            |                                |                |
| Bissau (ref)                                                                                                                                                                                                                                               |                            |                                |                |
| Bissora                                                                                                                                                                                                                                                    | 0.88                       | 0.37-2.09                      | 0.767          |
| Bafata                                                                                                                                                                                                                                                     | 0.78                       | 0.36-1.69                      | 0.533          |
| Gabu                                                                                                                                                                                                                                                       | 6.17                       | 2.35-16.15                     | <0.001         |
| <b>Current relationship status</b>                                                                                                                                                                                                                         |                            |                                |                |
| Single and never married (ref)                                                                                                                                                                                                                             |                            |                                |                |
| Stable partner who is not spouse                                                                                                                                                                                                                           | 8.70                       | 2.63-28.79                     | <0.001         |
| Married                                                                                                                                                                                                                                                    | 0.69                       | 0.17-2.77                      | 0.603          |
| Divorced/ Separated                                                                                                                                                                                                                                        | 0.70                       | 0.09-5.37                      | 0.731          |
| Widowed                                                                                                                                                                                                                                                    | 0.31                       | 0.03-3.18                      | 0.327          |
| <b>Was forced to have sex &lt;18 years old</b>                                                                                                                                                                                                             | 6.74                       | 2.05-22.13                     | 0.002          |
| <b>Ever pregnant</b>                                                                                                                                                                                                                                       | 0.40                       | 0.22-0.73                      | 0.003          |
| <b>Wants (more) children</b>                                                                                                                                                                                                                               | 0.31                       | 0.17-0.56                      | <0.001         |
| <b>Currently using contraceptive implant</b>                                                                                                                                                                                                               | 0.43                       | 0.24-0.77                      | 0.004          |
| <b>STI symptoms past 12 months</b>                                                                                                                                                                                                                         | 1.66                       | 0.95-2.90                      | 0.077          |
| <b>Ever tested for HIV</b>                                                                                                                                                                                                                                 | 0.43                       | 0.20-0.91                      | 0.027          |
| <b>Knowledge that anal sex puts you most at risk for HIV</b>                                                                                                                                                                                               | 0.12                       | 0.02-0.59                      | 0.009          |
| HIV=human immunodeficiency virus, STI=sexually transmitted infection<br>All variables included in the multivariate model are shown in the table.<br>If no category is listed, the reference category is “no” and the category shown in the table is “yes”. |                            |                                |                |
